# Supplementary material for: Future directions for deep ocean climate science and evidence-based decision making
Source: Frontiers journal article supplement (doi:10.3389/fclim.2024.1445694), 2024-10-31
Supplement: Table_1.xlsx [file Table_1.xlsx]

## Sheet: Sheet1
COLOR CODING: Pink entries are from dedicated knowledge gaps sections. Black entries are associated with statements of "low confidence". Grey rows were gathered during the survey but subsequently determined not relevant for the deep ocean and are omitted from our analysis.
THEME	WG	Chapter, Section, Subsections	Topic (specific)	Explicitly mentioned (1), not mentioned but relevant (2), not revelant- exclude (3)	Topic STRESSOR	Topic IMPACT	section title	Low confidence origins: (1) no explanation, (2) limited studies, (3) conflicting results, (4) magnitude uncertainty, (5) limited or no observation, (6) parametric uncertainties, (7) regional gaps, (8) low confidence in underlying projection for bio, (9) model gaps/simplification, (10) uncertainty in attribution to anthropogenic causes, (11) other	Other explained	REVIEWER (1+2) COMMENTS	Row number in MASTER
WIND											503
	1	9.2.3.4	PDO forcing spin up of the Alaska Gyre (1993-2017)	1	Air-Sea Fluxes	Ocean Circulation	Gyres, Western Boundary Currents and Inter-basin Exchanges	1		Ambiguous point	55
	1	2.3.1.4.4	"Confidence for both land and ocean surface wind trends was low owning to uncertainties in datasets and measures used."; "Differences between available wind speed estimates lead to low confidence in trends over the global ocean as a whole but with most estimates showing strengthening globally over 1980–2000 and over the last four decades in the Southern Ocean, western North Atlantic and the tropi…	2		Air-Sea Fluxes	Surface wind and sea level pressure	6		references AR5 finding. Later "low confidence in trends over the global ocean as a whole" is mentioned due to differences in product, but deep ocean impacts are not explicit	1
	1	3.3.3.1.2	low confidence in observed long-term Walker Circulation trends	2		Air-Sea Fluxes	Walker circulation strength	3,6,8		-	15
	SROCC	6.6	future projections of the trade wind system	2		Air-Sea Fluxes	Inter-ocean exchanges and global change	8,9	models don't simulate decadal variability or inter-ocean link	-	261
	1	4.5.1.1.2	magnitude and even sign of effect of changing westerly winds on Southern Ocean sea-surface warming	2	Air-Sea Fluxes	Ocean Temperature/Heat Content	Polar Amplification	3,4,6,9		-	18
	1	3.7.3	low confidence from the apparent change from East Pacific- to Central Pacific-type El Niño events that occurred in the last 20–30 years being representative of a long term change.	2	Air-Sea Fluxes	Ocean Circulation	El Niño–Southern Oscillation (ENSO)	10		increase in ENSO variability over the next century could lead to changes in circulation in the Southern Ocean, causing accelerated warming of Antarctica's deeper waters.	16
SEA ICE											504
	1	2.3.2.1.2	"Low confidence in all aspects of Antarctic sea ice prior to the satellite era owing to a paucity of records that are highy regional in nature and ofren seemingly contradictory"	2		Sea Ice/Ice Shelves/Ice Sheets	Antarctic Sea Ice	5,7		-	2
	1	3.4.1.2	attribution of small increase in Antartic sea ice extent	2		Sea Ice/Ice Shelves/Ice Sheets	Antarctic Sea Ice	9,10		-	8
	1	Table 4.10	Low confidence in reaching a tipping point for Antarctic sea ice	2		Sea Ice/Ice Shelves/Ice Sheets	Potential for Abrupt and Irreversible Climate Change	1		-	20
	1	Table 4.10	Low confidence in moderate winter and summer Antarctic sea ice decline	2		Sea Ice/Ice Shelves/Ice Sheets	Potential for Abrupt and Irreversible Climate Change	1		-	21
	1	10.1.Box 10.1	Projected Antarctic sea ice loss/change	2		Sea Ice/Ice Shelves/Ice Sheets	Special Report on the Ocean and Cryosphere in a Changing Climate (SROCC; IPCC, 2019b)	3,4		Reduction in sea ice can result in a change in food supply to the deep sea, and the influx of freshwater can affect circulation, which can affect food supply	63
	2	3.2.2.4	magnitude of Antarctic sea ice change projections	2		Sea Ice/Ice Shelves/Ice Sheets	Sea Ice Changes	3,4,6,9		Rreduction in sea ice can result in a change in food supply to the deep sea, and the influx of freshwater can affect circulation, which again can affect food supply	69
	SR 1.5C	3.3.8	Contrasting trends (regionally). Mixture of increased and decreased amounts of sea ice around the Antarctic, thus sea ice projections are not well supported.	2		Sea Ice/Ice Shelves/Ice Sheets	Sea Ice	3,9		Sea ice can certianly impact the deep-sea and specifically Antarctic Bottom Water production.	148
	SROCC	3.2.2.1	impacts of large knowledge gaps when attempting to project sea ice (Antarctic). Models cannot project which could directly result in underestimation of oxygen/Antarctic Bottom Water making it to the abyssal regions of our oceans.	2	Sea Ice/Ice Shelves/Ice Sheets	Ocean Circulation	Sea Ice	2,4,5,7,9		-	190
	1	9.3.1.1	low confidence in level of warming that will lead to a sea-ice free Arctic	2	Ocean Temperature/Heat Content	Sea Ice/Ice Shelves/Ice Sheets	Arctic Sea Ice Coverage	6,9		-	59
ICE SHEET/SHELF											505
	1	3.4.3.2.2	ocean forcing affecting ice sheet basal melt rates	2	Ocean Temperature/Heat Content	Sea Ice/Ice Shelves/Ice Sheets	Antarctic Ice Sheet	1	Explanation may be in 9.4.2.2, where this is discussed further.	-	9
	1	Box 9.1	Low confidence in how different forcings (ocean change and ice-shelf collapse) affect ice sheet processes, which are linked with sea level rise	2	Ocean Temperature/Heat Content & Ocean Circulation	Sea Ice/Ice Shelves/Ice Sheets & Sea Level Rise	Key Processes Driving Sea Level Change	1		-	46
	1	9.4.2.2	ocean forcing affecting basal melt, and simulated sub-shelf melt rates around Antarctica	2	Ocean Temperature/Heat Content & Ocean Circulation	Sea Ice/Ice Shelves/Ice Sheets & Ocean Salinity/Freshwater Content	Model Evaluation	2,9	model biases	limited studies is due to a limited number of available models	60
	1	9.4.2.3.2	Future change in temperature of Antarctic ice-shelf cavaties	2	Ocean Temperature/Heat Content	Sea Ice/Ice Shelves/Ice Sheets & Ocean Salinity/Freshwater Content	Sub-shelf melting	5,9	southern ocean SST biases in CMIP6	reasons of "low confidence" not mentioned here, but are mentioned in 9.2.3.2 (referenced here)	61
	1	9.4.2.3.2	Sub-ice-shelf melt rates	2		Sea Ice/Ice Shelves/Ice Sheets & Ocean Salinity/Freshwater Content	Sub-shelf melting	2,9	wide regional variations	"limited studies" and "model gaps" chosen to describe limited availability of cavity-resolving ocean models. NB cavaties can be found at depths > 200m	62
	SR 1.5C	3.6.3.2	Greenlands ice melting threshold (low confidence that is is as low as 1C)	2		Sea Ice/Ice Shelves/Ice Sheets & Sea Level Rise	Sea level	2		Insufficent evidence to quantify the range of this melting theshold.	161
	1	Figure 4.2	Sea level rise prediction:they run a low confidence and low likelihood case (outcome at the high end of SSP5‑8.5, which reflects deep uncertainties arising from potential ice-sheet and ice-cliff instabilities). This prediction at year 2100 indicates 1.7 m of GMSL rise relative to 1995–2014	2	Sea Ice/Ice Shelves/Ice Sheets	Sea Level Rise	Projected Changes in Global Climate Indices in the 21st Century	4,6,9		-	17
	SR 1.5C	3.7.2.2	Antarctic ice sheet dynamics, global sea level, and links between seasonal and year-long sea ice in both polar regions.	2	Sea Ice/Ice Shelves/Ice Sheets	Sea Level Rise	Physical and chemical characteristics of a 1.5°C warmer world (under Gaps in Understanding)	1		-	172
	SROCC	4.2.3.1.2	low confidence is widespread iceshelf loss	2		Sea Ice/Ice Shelves/Ice Sheets	Antarctica	5,9		Comment base on 1 model study; iceshlef loss could lead to drastic changes in deep waters	213
	SROCC	4.2.3.5	low confidence in effect of complete loss of Greenland Ice sheet and Antarctic Ice Sheet to long-term SLR	2	Sea Ice/Ice Shelves/Ice Sheets	Sea Level Rise	Long-term scenarios, beyon 2100	6	uncertainty in processes that could cause ice sheet retreat	-	214
SEA LEVEL											506
	2	13.1.4	Regional deviations from global mean SLR	2		Sea Level Rise	European Climate: Main Conclusions of WGI AR6	7		-	99
	2	Figure 16.2	Low confidence of climate change or weather fluctuations to sea level rise	2		Sea Level Rise	Impacts of climate change or weather fluctuations	2,4,5,7		Not deep sea specific, but focused on sea level rise impacts within the coastal systems category (could maybe be relevant to nearshore deep sea ecosystems like canyons and fjords)	116
	AR6 Synthesis	3.1.3	Amount of SLR (2m by 2100; 15m by 2300) under SSP5-8.5	2	Air-Sea Fluxes	Sea Level Rise	The Likelihood and Risks of Abrupt and Irreversible Change	4,6	Uncertainty in ice sheet melt	-	138
	AR6 Synthesis	3.1.3	Amount of global mean sea level rise under warming of 1.5 and 2.0oC	2	Air-Sea Fluxes	Sea Level Rise	The Likelihood and Risks of Abrupt and Irreversible Change	1		-	139
	AR6 Synthesis	3.2 Fig. 3.4	Future Sea Level Rise	2	Air-Sea Fluxes	Sea Level Rise	Long Term Adapatation and Limits	4,6	Uncertainty in ice sheet melt	-	140
	SR 1.5C	3.5.2.5	The magnitude of global sea level rise that could occur over the next two centuries under 1.5°C–2°C of global warming is estimated to be in the order of several tenths of a metre according to most studies	2	Ocean Temperature/Heat Content	Sea Level Rise	RFC 5 - Large-scale singular events	4		-	160
OVERTURNING											507
	1	2.3.3.4.1	Low confidence in an increase of the Southern Ocean upper cell overturning circulation since 1990s	1		Ocean Circulation	Atlantic Meridional Overturning Circulation	5		-	4
	1	3.5.4.2	observed intensification of upper-ocean overturning in the Southern Ocean	1		Ocean Circulation	Southern Ocean Circulation	1	Explanation may be in 9.2.3.2	-	14
	1	Table 4.10	Low confidence in reversibility of Southern MOC (within decades to century) if forcing is changed	1	Air-Sea Fluxes	Ocean Circulation	Potential for Abrupt and Irreversible Climate Change	1		-	22
	SROCC	3.7	projections of future Southern Ocean circulation & watermasses	1		Ocean Circulation & Watermasses	Southern ocean circulation: drivers, changes and implications	9		models poorly represent transformation processes for AABW and do not include observed increase in FW forcing from AIS melt. OMISSIONS: No mention of polar geoengineering	206
	SROCC	3.7	Southern Ocean overturning (no direct measurements and only sparse indirect indicators of how it may be changing)	1		Ocean Circulation	Key Knowledge Gaps and Uncertainties	5		cited as "critical weakness in sustained observations of the global ocean"	207
	SROCC	cross-chapter box 7	long-term changes in upper cell overturning in the Southern Ocean	1		Ocean Circulation	Souther ocean circulation: drivers, changes and implications	5		limited direct observations combined with significant inter-decadal variability is cause of large uncertainty	263
	SROCC	cross-chapter box 7	projections of future Southern Ocean circulation & watermasses	1		Ocean Circulation & Watermasses	Souther ocean circulation: drivers, changes and implications	9		models poorly represent transformation processes for AABW and do not include observed increase in FW forcing from AIS melt	264
	1	2.3.3.4.1	Overall decline of AMOC during 20th century	1		Ocean Circulation	Atlantic Meridional Overturning Circulation	5		-	5
	1	3.5.4.1	AMOC weakened through 20th Century	1		Ocean Circulation	Atlantic Meridional Overturning Circulation	5		Indirect proxies	11
	1	3.5.4.1	anthropogenic forcing has influenced AMOC strength since 2004	1		Ocean Circulation	Atlantic Meridional Overturning Circulation	3,9,10		-	12
	1	3.5.4.1	anthropogenic forcing has had a significant influence on changes in AMOC strength during the 1860–2014 period	1	Air-Sea Fluxes	Ocean Circulation	Atlantic Meridional Overturning Circulation	3,5,9,10		-	13
	SR 1.5C	3.4.4.4	Causal connection between climate change and AMOC weakening	1	Air-Sea Fluxes	Ocean Circulation	Ocean Circulation	1		-	151
	1	9.2.3.1	20th century AMOC change (low confidence in both modelled and reconstructed AMOC responses)	1		Ocean Circulation	Atlantic Meridional Overturning Circulation	3,5	recent work has revealed issues with array-based transport estimates leading to large AMOC uncertainty. Many proxy-based estimates have also been called into question. Different proxies offer contrasting picture of AMOC trend.	limited length of observational record cited along with large discrepancy between modeled and reconstructed AMOC and uncertainty over realism of modeled response	50
	1	9.2.3.1	model's projected timing & magnitude of AMOC weakening & causal forcing	1		Ocean Circulation	Atlantic Meridional Overturning Circulation	3,9	model biases, especially in location of key transformations (associated with uncertainties in FW forcing, sea-ice extent, overflow strength)	"conflicting results" associated with huge AMOC spread in CMIP6 (no improvement over CMIP5)	51
	2	3.2.2.3	AMOC quantification of changes has low confidence because of low agreement in the reconstructred and simulated strends. time period since mid-2000s too short to differentiate between natural variability, natural forcing, and anthropogenic forcing (which has high confidence).	1		Ocean Circulation	Changes in Ocean Circulation, Stratification and Coastal Upwelling	4,5,10		-	68
OTHER CIRCULATION											508
	1	5.3.3.1	changes in the ventilation of the ocean interior affect the delivery of metabolic and anthropogenic CO2 changes into deeper waters and their rate of acidification; "the large knowledge gap around ventilation changes leads to low confidence in their impacts in many ocean regions"	1	Ocean Circulation	Ocean Acidification	Ocean Acidification and Deoxygenation	1		-	28
	SROCC	6.7.1.1	cooling of subpolar gyre in North Atlantic and changes in convection	1		Ocean Circulation & Ocean Temperature/Heat Content	Observational and Model Understanding of Atlantic Ocean Circulation Changes	3,9	models don't simulate convection well	-	262
	SR 1.5C	3.7.2.4	How ocean circulation is changing towards 1.5°C and 2°C warmer worlds, including vertical mixing, deep ocean processes, currents	1		Ocean Circulation & Ocean Temperature/Heat Content & Meso/Submeso-scale processes inc. mixing	Ocean Systems (under Gaps in Understanding)	1		-	179
	SROCC	6.1	Detection, attribution and projection of physical aspects of climate change at regional and local scales	2		Other (Physical)	Knowledge Gaps (Extreme Events)	2,7,8		Most of the low confidence mentions in Chapter 6 indirectly relate to deep sea through physical processes, e.g. TC's, waves, etc.. and the connectivity between surface and deep and our limited understanding either through observation or modeling of potential impacts into the future. Origins of uncertainty include limited attribution studies in some regions and model resolution	247
	1	9.2.3.4	Future evolution of Agulhas leakage	2		Ocean Circulation	Gyres, Western Boundary Currents and Inter-basin Exchanges	9		CMIP model resolution does not allow for direct simulation of Agulhas leakage	56
	1	9.2.3.5	Attribution of observed changes in eastern boundary upwelling systems	2	Air-Sea Fluxes	Ocean Circulation	Eastern boundary upwelling systems	5,9		"model gaps" associated with missing resolution. High natural variability is also cited as a source of "low confidence".Filed under "limited obs" because low confidence in lon-term situ marine wind data is mentioned. "air-sea flux" chosen as the stressor, because wind forcing is key driver.	57
	SR 1.5C	3.3.7	Implications of trends detected in upwelling and whether future changes (e.g., with warming increasing from 1C to 1.5C and from 1.5C to 2C) are well-informed by past increase in GMST of 0.5C	2	Ocean Temperature/Heat Content	Ocean Circulation	Ocean Circulation and Temperature	2,5,7,8		"low confidence" issue here is predicting extent of upwelling change from observed past changes.	147
OTHER PHYSICAL											509
	SROCC	5.7	Deep ocean temperature and salinity measurements for sea-level and closure of the energy budget	1	Ocean Temperature/Heat Content & Ocean Salinity/Freshwater Content	Sea Level Rise	Key Uncertainties and Gaps	1		-	267
	1	9.2.2.1	past/current deep-ocean heat content/transport change	1		Ocean Temperature/Heat Content & Ocean Circulation	Ocean heat content and heat transport	3		"conflicting results" associated with low agreement between reanalyses.	48
	1	9.2.3.2	limited evidence and low agreement in role of polynyas in driving AABW trends	1	Sea Ice/Ice Shelves/Ice Sheets	Watermasses	Southern Ocean	2,3		-	53
	1	9.2.3.2	modelled AABW decrease	1		Watermasses	Southern Ocean	1		-	54
	SROCC	3.3.3.2	Acceleration of AABW freshening	1	Ocean Salinity/Freshwater Content	Watermasses	Physical Oceanography	5	strong interannual variability complicates trend evaluation	-	203
	1	4.5.1.1.2	whether polar-amplified warming will emerge in the Southern Hemisphere this century	2		Ocean Temperature/Heat Content	Polar Amplification	3,4,6,9		-	19
	SROCC	3.2.2.2	magnitude of future changes in Southern Ocean hydrography	2		Ocean Salinity/Freshwater Content & Ocean Temperature/Heat Content	Physical Oceanography	3	model T biases	warming and freshening trends discussed along with mixed layer and stratification evolution. Sign of model changes is robust but CMIP5 spread is large and biases exist	191
	1	2.3.3.1	"At multi-centennial timescales, changes in OHC demonstrate a tight link with surface temperature changes during the Holecene and CE (low confidence)"	2		Ocean Temperature/Heat Content	Global Temperature, Heat Content and Thermal Expandsion	1		-	3
	1	7.4.4.1.1	low confidence in the time scales associated with Southern Ocean warming (e.g., whether SH high latitudes will warm more then the tropics this century) and the response to surface freshwater forcing (e.g., whether freshwater input from ice shelves will reduce warming by several tenths of a degree C over 21st centure by increasining stratication) due to "low evidence" and because freshwater input …	2	Sea Ice/Ice Shelves/Ice Sheets	Ocean Temperature/Heat Content	Critical Processes Driving Polar Amplification	5,6,9		-	45
	1	9.2.1.3	future evolution of mixed-layer depth	2		Meso/Submeso-scale processes inc. mixing	Upper-ocean stratification and surface mixed layers	3,5,8,9	projection dependence on emission scenario	"limited observations" prevent estimate of current winter MLD trends. "conflicting results" associated with inconsistency between models in many regions. "model gaps" associated with incomplete representation of turbulence processes and model biases that result.	47
	2	3.2.4.2	Time of emergence of anthropogenic changes in climate-induced drivers in subsurface properties, ocean extreme events and vulnerable regions	2		Other (Physical)	Time of Emergence	2		-	70
OTHER CHEMICAL/BGC
	SR 1.5C	3.3.10	Impacts of changing ionic composition of seawater (in response to ocean acidification)	2	Ocean Acidification	Other (Biogeochemical)	Ocean Chemistry	1		Suggests that ocean acidification also influences the ionic composition of seawater by changing the organic and inorganic speciation of trace metals and these changes are expected to have impacts although currently poorly documented.	149
	1	5.3.1.1	past rates of ocean acidification (PETM, last deglacial transition) are not well quantified due to inherent uncertainties within sediment proxies	2		Ocean Acidification	Ocean Acidification and Deoxygenation	4,6		-	27
	SROCC	5.2.2.4	Reversal of topical ocean oxygen decline by 2150	2		Ocean Deoxygenation	Changing ocean oxygen	5		Deep ocean not directly mentioned- doesn't specify epipelagic or deep tropical waters but topic is relevant to the deep sea	216
	SROCC	5.2.5	Regional oxygen content declines by 2100 predicted by CMIP5	2		Ocean Deoxygenation	Risk assessment of open ocean ecosystems	7		-	236
BIOLOGY (biomass/productivity/foodwebs)											511
	SROCC	5.2.3.2.2	Warming will increase biomass of mesopelagic zooplankton and fish living in the deep scattering layer	1	Ocean Temperature/Heat Content	Biomass	Future changes in the deep ocean	2		-	222
	SROCC	5.2.3.2.2	Changes in trophic transfer efficiency in deep ocean food webs	1		Ecosystems	Future changes in the deep ocean	2		-	223
	1	2.3.4.2.2	decreasing trend in marine primary production, of –0.8 PgC (–2.1%) per decade globally. There is low confidence in this trend because of the small number of studies and the short length of the time series (<20 years).	2		Primary Production	Marine Primary Production	2,5		-	7
	1	12.4.8	Increase in upper ocean stratification can lead to reduced nutrient supply and PP	2	Ocean Temperature/Heat Content & Ocean Salinity/Freshwater Content	Nutrient Cycle	Open and Deep Ocean	1		-	65
	1	2.3.4.2.1	Long-term trends in areal extent of oligotrophic gyre provinces	2		Ecosystems	Large-scale distribution of marine biota	5		-	6
	2	3.4.3.2.2	Phytoplankton growth phenological changes	2		Primary Production	Projected changes	8		-	80
	2	3.4.3.2.2	Regional patterns in phytoplankton phenological productivity changes	2		Primary Production	Projected changes	4		-	81
	2	3.4.3.5.2	Projected global decline in NPP difficult because of poorly understood dominant drivers of primary productivity	2		Primary Production	Projected changes in primary productivity	9		-	84
	2	CCP6.2.1.1	Primary productivity has increased in the Pacific sector and decreased in the Atlantic sector and the Ross Sea	2		Primary Production	Primary productivity	1		-	127
	SR 1.5C	3.4.4.12	Observed changes in NPP in subtopical gyres	2		Primary Production	Key ecosystem services (e.g., carbon uptake, coastal protection and tropical coral reef recreation)	2		-	156
	SROCC	3.2.3.1.1	There is evidence that the combination of loss of sea ice, freshening, and regional stratification has affected the timing, distribution and production of primary producers and that the reduction in sea ice area and thickness in the Arctic Ocean appears to be indirectly impacting rates of net primary production (NPP) through increased exposure of the surface ocean to atmospheric forcing and these…	2	Sea Ice/Ice Shelves/Ice Sheets & Ocean Temperature/Heat Content & Ocean Salinity/Freshwater Content	Primary Production	Plankton and primary production (within Arctic section)	4,9		top down effect on the deep	193
	SROCC	5.2.2.6	Warming impacting NPP and export production	2	Ocean Temperature/Heat Content	Primary Production & Food supply (POC flux)	Changing ocean primary and export production	3,5		deep sea not specified but should be included because of food supply to deep ocean	217
	SROCC	5.7	Open ocean primary productivity (corroborating measurements and improved understandng of drivers required). Does not call out deep consequences)	2	Ocean Temperature/Heat Content	Primary Production	Key Uncertainties and Gaps	1		-	271
	SROCC	SPM B2	altered net primary production	2	Ocean Temperature/Heat Content	Primary Production	Projected Physical Changes	1		-	276
	SROCC	SPM B2.2	altered net primary production	2	Ocean Temperature/Heat Content	Primary Production	Projected Physical Changes	1		-	277
	SROCC	SPM B.5.2	increased Antarctic primary production	2	Nutrient Cycle	Primary Production	Projected Physical Changes	1		-	278
	SROCC	5.2.5	Increase in NPP at high latitutdes, predicted by CMIP5	2	Nutrient Cycle	Primary Production	Risk assessment of open ocean ecosystems	1		-	237
	SR 1.5C	3.7.2.4	The impacts of changing ocean conditions at 1.5°C and 2°C of warming on foodwebs, disease, invading species, coastal protection, fisheries and human well-being, especially as organisms modify their biogeographical ranges within a changing ocean.	2	Ocean Temperature/Heat Content	Ecosystems & Fisheries	Ocean Systems (under Gaps in Understanding)	1		-	180
	2	3.4.2.9	projected changes in fish biomass because of changes in upwelling unclear	2	Ocean Circulation	Biomass	Upwelling Zones	8		-	77
	2	3.4.3.1.3	Deep-scattering layer biomass increases	2	Ocean Temperature/Heat Content	Biomass	Projected changes in species range shifts	1		-	79
	2	3.4.3.4.2	global zooplankton biomass decline	2		Biomass	Projected changes	4,8		-	82
	2	3.4.2.10	climate warming influencing key mechanisms determining energy transfer between trophic levels	2		Ecosystems	Polar Seas	4		-	73
	2	3.4.2.10	Primary and secondary production trajectories	2		Primary Production	Polar Seas	3,4		-	75
	2	3.4.3.5.1	Nonlinear trends in interannual productivity across global and regional scales influenced by natural temporal variability	2		Primary Production	Observed changes in primary productivity	3,6		-	83
	2	11.3.2.2	Low confidence in the projections regarding nutrient availability and productivity in the sub-tropical waters of New Zealand and the sub-Antarctic waters.	2		Micro-nutrients cycle	Coastal and Ocean Ecosystems	2,3	Due to the low confidence level, further research and investigation are needed to gain a better understanding of these projections and their potential impacts on fish and other species in both sub-tropical and sub-Antarctic waters of New Zealand.	-	96
	SROCC	5.2.4.2	Effects of decreased POC supply to animal body size	2	Food supply (POC flux)	Physiology	Open ocean seafloor-- abyssal plains	2		-	227
BIOLOGY (ecosystems/habitats/ranges) inc seamounts, vents, seeps, eastern boundary upwelling systems											512
	SROCC	5.7	interaction of climate and non-climate hazards in deep seafloor environments	1		Ecosystems & Biodiversity	Key Uncertainties and Gaps	1		-	272
	SROCC	5.7	linkages between single organisms to communities of organisms in deep seafloor environments	1		Ecosystems & Biodiversity	Key Uncertainties and Gaps	1		-	272
	SROCC	5.7	climate feedbacks in biological systems in deep seafloor environments	1		Ecosystems & Biodiversity	Key Uncertainties and Gaps	1		-	272
	SROCC	5.7	capacity and limits of adaptation of deep seafloor ecosystems	1		Ecosystems & Biodiversity	Key Uncertainties and Gaps	1		-	272
	SROCC	5.2.4.2	Effect of climate change on abyssal ecosystems through decreased food supply	1		Food supply (POC flux)	Open ocean seafloor-- abyssal plains	1		-	226
	SROCC	5.7	Understanding of biological processes and monitoring in certain ecosystems (specific reference made to the deep sea floor)	1		Ecosystems	Key uncertainties and gaps	3,5,6		-	245
	SR 1.5C	3.4.4.5	Impacts of ocean acidification on deep-water ecosystems	1	Ocean Acidification	Ecosystems	Ocean Acidification	2		This issue is cited with "low-medium confidence"	152
	SR 1.5C	3.7.2.4	Deep sea processes and risks to deep sea habitats and ecosystems at 1.5C warming	1	Ocean Temperature/Heat Content	Ecosystems	Ocean Systems (under Gaps in Understanding)	1		-	177
	SROCC	5.2.4.3	Reduction in suitable seamount habitat for species	1	Ocean Temperature/Heat Content	Ecosystems	Bathyal Ecosystems	1		-	231
	SROCC	5.2.4.4	Changes in species distribution and cover in vent and seep ecosystems	1		Ecosystems	Chemosynthetic Ecosystems	2		-	235
	SROCC	5.2.4.4	Reduced calcification and growth rates of vent species	1	Ocean Acidification	Physiology	Chemosynthetic Ecosystems	2		-	233
	SROCC	5.2.4.3	Effects of increased stratification on organic matter transport to seamounts	1	Meso/Submeso-scale processes inc. mixing	Food supply (POC flux)	Bathyal Ecosystems	1		-	228
	SROCC	5.2.4.3	Effects of warming on fish reproduction on seamounts	1	Ocean Temperature/Heat Content	Fisheries	Bathyal Ecosystems	1		-	230
	SROCC	3.2.3.2.2	Benthic communities in shallow water habitats mostly consist of dark-adapted invertebrates and rely on sea ice to create low-light marine environments. Increases in the amount of light reaching the shallow seabed under climate change may result in ecological regime shifts, in which invertebrate-dominated communities are replaced by macroalgal beds.	1	Ocean Temperature/Heat Content	Biodiversity	Benthic communities	1		Although only discussing shallow-water benthic communities, this could have a large-scale top-down effect. Organisms such as sea spiders with large vertical distributions can continue to move into deeper waters but for shallower-water species, they may experience large-scale reductions in suitable temperature habiatats which could then effect nutrients cycling off the shelf, down the slope and in…	197
	2	3.4.2.9	refugia potential of eastern boundary upwelling systems for marine heatwaves	2	Ocean Circulation	Ecosystems	Upwelling Zones	3		-	78
	2	3.4.2.9	projected trends in upwelling and links to ecology in eastern boundary upwelling systems unclear	2	Ocean Circulation	Ecosystems	Upwelling Zones	1		-	76
	AR6 Synthesis	2.1.2 Fig. 2.3	Changes in seasonal timing (phenology) of ocean ecosystems around Africa, Australasia and central + south America	2	Air-Sea Fluxes	Ecosystems	Observed Climate System Changes and Impacts to Date	2,5,7		Gaps called out for Africa, Ausatralasia, Central & South America. OMISSIONS: No dedicated knowledge gaps section found here	136
	2	5.7.4.2.2 (Table 5.10; rows 4, 5 and 7)	Impacts of climate change and associated changes in sea ice on marine mammals. Note that while these live in the surface, they can hunt at depth (e.g. Narwhals up to 400m)	2	Ocean Temperature/Heat Content & Sea Ice/Ice Shelves/Ice Sheets	Fisheries	Wild food in the arid and semi-arid environments	2		Note that rows 4-5 of the Table concerned Low evidence, not low confidence. Note that although these animals live mostly at depth (except the Beluga that lives at depth), they can hunt at depths well below 200m, hence, relevant to deep-ocean ecosystems (e.g. narwhal known to hunt at 400-500m)	86
	SROCC	3.7	Regional polar ecosystems and biodiversity inc population estimates/trends for key species	2		Ecosystems & Biodiversity	Key Knowledge Gaps and Uncertainties	2,5,7		-	208
	2	3.4.2.10	limited mechanistic understanding of OA outcomes on polar ecosystems	2	Ocean Acidification	Ecosystems	Polar Seas	2,3,6	limited mechanistic understanding	-	74
	SR 1.5C	3.4.4.6	Deoxygenation as a causal forcing for increasing number of dead zones	2	Ocean Deoxygenation	Ecosystems	Deoxygenation	1		This issue is cited with "low-medium confidence"	153
	SR 1.5C	3.4.4.10	The role of refugia in reducing ecosystem loss	2	management/policy	Ecosystems	Framework organisms (tropical corals, mangroves, and seagrass)	2		A full understanding of the role of refugia in reducing loss of ecosystems has yet to be developed	154
	2	CCP1.2.1.1.2	Climate-driven changes in depth habitats	2		Ecosystems	Observed impacts on biodiversity	2		There is low confidence in how climate interacts with exploitation (Yellow Sea) and how acidification affects biodiversity	119
	SROCC	5.5.2.1.4	knowledge gaps on implementation and limitations of ecosystem-based adaptation	2	Ocean Temperature/Heat Content & Ocean Deoxygenation & Ocean Acidification	Ecosystems	Ecosystem-based adaptation	1			266
	SR 1.5C	3.7.2.4	How changes in ocean chemistry in a 1.5°C warmer world, including decreasing ocean oxygen content, ocean acidification and changes in the activity of multiple ion species, will affect natural and human systems.	2	Ocean Acidification & Ocean Deoxygenation	Ecosystems	Ocean Systems (under Gaps in Understanding)	1			178
	2	Figure 16.10	Low confidence of climate warming and adaptation on the severity conditions of representative key risks to low lying coastal systems and terrestrial and marine ecosystems by the end of this century	2	Ocean Temperature/Heat Content	Ecosystems	Synthesis of the severity conditions for Representative Key Risks by the end of this century	2,7		Deep sea falls under some of the categories under marine ecosystems (change structure/functioning, loss of ecosystem goods/services, natural coastal protection and habitats, loss of biodiversity)	118
BIOLOGY (corals)										-	513
	SROCC	5.2.4.3	Effects of warming on deep-water corals	1	Ocean Temperature/Heat Content	Physiology	Bathyal Ecosystems	2		-	229
	2	Box 3.3	Survival of deep-water coral D. perusum under hypoxic conditions	1	Ocean Deoxygenation	Physiology	Deep-Sea Ecosystems	3		Conflict mainly comes from differences between observations and experimental data	85
	2	CCP4.3.1	deep-water corals biotic potential reduced due to warming	1	Ocean Temperature/Heat Content	Physiology	Ocean Systems	1		Does not mention 'low confidence' but mentions knowledge gaps about this topic	123
	SR 1.5C	3.4.4.10	Whether ex situ conservation approaches to help restore coral reefs are cost-effective under rapid climate change	2	management/policy	Ecosystems	Framework organisms (tropical corals, mangroves, and seagrass)	2,5		There is also interest in ex situ conservation approaches involving the restoration of corals via aquaculture (Shafir et al., 2006; Rinkevich, 2014) or the use of ‘assisted evolution’ to help corals adapt to changing sea temperatures (van Oppen et al., 2015, 2017), although there are numerous challenges that must be surpassed if these approaches are to be cost-effective responses to preserving co…	155
	SROCC	4.4.2.3.4	limited evidence and low agreement on how changes in ocean temperature and acidity influence the extent, distribution and health of coral reefs and oyster reefs in the long term	2	Ocean Temperature/Heat Content & Ocean Acidification	Ecosystems	Effectiveness of ecosystem-based adaptation	5		-	215
BIOLOGY (FISH/OTHER MARINE SPECIES)											514
	SROCC	Box 5.2	Vulnerability of cold water sponges and their habitats	1	Ocean Temperature/Heat Content & Ocean Acidification & Ocean Deoxygenation	Physiology	Cold water corals and sponges	1			246
	2	CCP1.2.1.2.2	Extinction risk for marine species	2	Ocean Temperature/Heat Content	Biodiversity	Projected impacts on biodiversity	2,3		This seems to focus on the mediterranean - but does not specify deep sea.	120
	SROCC	3.2.3.1.3	changes in ocean conditions impacting subarctic & Arctic pelagic fish species partitioning and impacts on cold-adapted species	2	Ocean Temperature/Heat Content	Ecosystems	Fish (within Arctic section)	1		"ocean conditions" cited as stressor, interpreted to mainly be temperature	194
	SROCC	3.2.3.2.1	The distribution of Antarctic krill is expected to change under future climate change because of changes in the location of the optimum conditions for growth and recruitment. The greatest projected reductions in krill due to the effects of warming and ocean acidification are predicted for the southwest Atlantic/ Weddell Sea region (low confidence)	2	Ocean Temperature/Heat Content & Ocean Acidification	Ecosystems	Plankton and pelagic primary production	1		Changes in primary production in a fisheries dense area could result in fisheries zonation changes, trophic collpase in this region due to a lack of sustain primary production, all having a top-down effect on the deeper ecosystems off the shelf of the Weddell.	196
	SROCC	3.2.3.2.3	Icefish response to warming waters in marginal habitats	2	Ocean Temperature/Heat Content	Ecosystems	Fish (within Southern Ocean section)	1		-	198
	SROCC	3.2.3.2.3	Climate impacts on habitat reduction and increased competition for the Antarctic toothfish	2	Ocean Temperature/Heat Content	Ecosystems	Fish (within Southern Ocean section)	1		-	199
	SROCC	3.2.3.2.5	End of century climate impacts on Antarctic seafloor species under high emissions scenarios	1	Ocean Temperature/Heat Content	Ecosystems	Pelagic foodwebs and ecosysem structure	1		-	200
	SROCC	5.2.5	Evolutionary adaptation to warming and decrease in oxygen (fishes)	2	Ocean Temperature/Heat Content	Ocean Deoxygenation	Risk assessment of open ocean ecosystems	1		-	239
BIOLOGY (other)											515
	SROCC	5.7	Capacity to address risks of climate change in the deep sea (need for better biological monitoring and process understanding)	1		Ecosystems	Key Uncertainties and Gaps	1		-	274
	SROCC	5.2.3.2.2	Effect of climate change on biological processes in the deep ocean	1		Ocean Carbon Cycle & Ecosystems & Other (Biological)	Future changes in the deep ocean	2		Impact could also be ecosystems or biology (other) for biological processes	225
	2	3.3.3.2	acidification dominates behavioural effects	2	Ocean Acidification	Ecosystems	Effects of Multiple Drivers on Animals	3		difficulty in replicating these studies in deep-sea animals!	72
	2	11.3.2.1	Low confidence of increased energetic costs for calcifiers of shoaling Aragonite Saturation Horizon	2	Ocean Acidification	Physiology	Coastal and Ocean Ecosystems	1		Implicit deep sea connection (Omega_Arag is ~1000m depth, Fig.2 https://doi.org/10.1080/00288330.2017.1374983)	92
	2	11.3.2.1	The Aragonite Saturation Horizon in a significant portion of New Zealand may have become shallower by 50-100 meters. This change could impact calcifying species by potentially limiting their growth and increasing their energy requirements. However, the level of confidence in this observation is low.	2	Ocean Acidification	Physiology	Coastal and Ocean Ecosystems	10		It's important to note that the specific impacts may vary depending on the species and the extent of the shallowing of the Aragonite Saturation Horizon in different regions of New Zealand. Ongoing research and monitoring are necessary to assess the precise consequences and develop appropriate conservation strategies to mitigate potential harm to calcifying species and their ecosystems.	93
	2	3.3.2	Silification changes as a result of changes in carbon chemisty	2	Other (Biogeochemical)	Physiology	Responses to single drivers	1		-	71
	2	11.3.2.2	The acidification, specifically in the case of the oyster species Saccostrea glomerate, could potentially impact sex determination and lead to changes in sex ratios	2	Ocean Acidification	Physiology	Coastal and Ocean Ecosystems	2		The alteration in sex ratios may, in turn, have implications for the reproductive success of the species. However, it is important to note that the confidence level regarding this effect is currently low, indicating a need for further research and investigation to establish a clearer understanding of the relationship between acidification and sex determination in oysters. The study conducted by P…	95
	2	13.4.1.2	Emergence of harmful algal blooms and pathogens at higher GWLs is unclear across all European seas	2	Other (Physical)	Other (Biological)	Projected risks	1		relevant to deep sea ecosystems since HAB biomass can sink down to the deep sea	103
	SROCC	3.3.3.3	The erosion of newly exposed glacial sediments in front of retreating land-terminating glaciers and changes in the diffuse nutrient fluxes from newly exposed glacial sediments on the seafloor may amplify nutrient supply, whilst other nutrient sources may be cut off (e.g., icebergs, upwelling of marine water).	2	Sea Ice/Ice Shelves/Ice Sheets	Nutrient Cycle	Biogeochemistry	1		Top-down imapcts from nutrient to food-web to deep sea ecosystem function	204
	SROCC	5.2.4.4	Alteration of larval transport and population connectivity because of circulation changes	2	Ocean Circulation	Ecosystems	Chemosynthetic Ecosystems	2			234
	SROCC	5.7	Viruses and protists	2		Other (Biological)	Key Uncertainties and Gaps	1		-	273
	SROCC	5.7	Physical and ecological processes in Earth System Models (processes are omitted or incompletely understood)	2		Meso/Submeso-scale processes inc. mixing	Key Uncertainties and Gaps	1		-	269
CARBON CYCLE											517
	1	5.4.4.1	climate change alters carbon burial in ocean sediments, constituting a (positive or negative) climate feedback mechanism	1	Ocean Carbon Cycle	Food supply (POC flux)	Biogeochemical Feedbacks on Climate Change	1		-	33
	SROCC	5.5.1.2.5	Using sediment disturbance control for climate mitigation	1	Ocean-Based Climate Interventions	Ocean Carbon Cycle	Control of sediment disturbance, enhanced weathering, and other geochemical approaches	2,6		-	244
	SROCC	5.2.5	Decrease in POC flux to the seafloor	1	Food supply (POC flux)	Food supply (POC flux)	Risk assessment of open ocean ecosystems	1		-	240
	SROCC	5.2.3.2.1	POC transfer efficiences across latitudes	2		Food supply (POC flux)	Detection and attribution of biological changes in the deep ocean	3,4		magnitude uncertainty because projections in phytoplankton community and therefore production because of potential synergistic effects of warming and acidification (low condifence rating)	219
	SROCC	5.2.3.2.1	Temperature effects on POC remineralization vs. solubilization by microbes	2	Ocean Temperature/Heat Content	Ocean Carbon Cycle	Detection and attribution of biological changes in the deep ocean	2		-	220
	1	5.5.1	role of ocean processes (changing ventilation, diminishing ocean ability to take up heat and carbon) on the variability and uncertainty of transient climate response to cumulative emissions of CO2 on centennial timescales	2	Ocean Temperature/Heat Content	Ocean Carbon Cycle	Remaining Carbon Budgets	1		The low confidence statement associated with those topics is given in the introduction section 5.1.1, top of page 682	39
	1	5.2.1.3.1	magnitude of winter outgassing from the Southern Ocean	2		Ocean Carbon Cycle	Historical Trends, Variability and Budgets of CO2, CH4 and N2O	6		reduces confidence in ocean carbon sink	23
	1	5.4.4.1	"On centennial time scales, there is thus low confidence in the overall effect of intensifying winds in the Southern Ocean on CO2 uptake". Wind change circulation, which can change CO2 uptake, hence stressor selected is ocean circulation	2	Air-Sea Fluxes	Ocean Circulation & Ocean Carbon Cycle	Biogeochemical Feedbacks on Climate Change	9		-	34
	1	Cross-ch box 5.3	Increase in SO upper overturning cell (low confidence) leads to increase in heat and carbon uptake	2	Ocean Circulation	Ocean Carbon Cycle	The Ocean Carbon–Heat Nexus and Climate Change Commitment	1		-	38
	1	5.2.1.3.1	ocean CO2 sink hiatus in the 1990s	2		Ocean Carbon Cycle	Historical Trends, Variability and Budgets of CO2, CH4 and N2O	3,5,7		-	24
	1	5.2.1.3.2	Data sparseness in the high latitudes and the relatively short length of the observational records leads to low confidence in the attribution of the processes that link regional–global variability [of ocean carbon fluxes] to climate	2		Ocean Carbon Cycle	Historical Trends, Variability and Budgets of CO2, CH4 and N2O	5		-	26
	1	5.3.4.1	"the magnitude and sign (direction) of many of ocean carbon–climate feedbacks are still poorly constrained (Matear and Lenton, 2014, 2018), leading to low confidence in their significant and long-lasting impacts on ocean acidification.	2	Ocean Carbon Cycle	Ocean Acidification	Ocean Acidification and Deoxygenation	3,4		Statement is vague and refers to Matear and Lenton, 2014, 2018	31
	1	5.4.2	biological drivers (not defined) act to decrease seawater CO2 buffering capacity, leading to a decrease in oceanic CO2 uptake	2	Other (Biological)	Ocean Carbon Cycle	Direct CO2 effect on projected Ocean Carbon Uptake	1		-	32
	1	5.4.4.2	biological carbon pump altered (whether increased or decreased is uncertain) by changes in small phytoplankton-driven pump	2	Primary Production	Ocean Carbon Cycle	Biological Driversof Future Ocean Carbon Uptake	3,4		-	35
	1	5.4.4.2	lack of knowledge of magnitude and sign of biological feedback to climate	2	Other (Biological)	Ocean Carbon Cycle	Biological Driversof Future Ocean Carbon Uptake	1		-	37
	1	5.6.2.2.2	nutrient addition to the oceans contributes to climate change mitigation	2	Ocean-Based Climate Interventions	Ocean Carbon Cycle	Biogeochemical Implications of Carbon Dioxide Removal and Solar Radiation Modification	2,4,5		-	42
	SROCC	5.2.3.2.2	Changes in biological carbon storage	2		Ocean Carbon Cycle	Future changes in the deep ocean	2		Impact could also be ecosystems or biology (other) for biological processes	224
	SROCC	5.2.5	How climate will affect the biological pump	2		Ocean Carbon Cycle	Risk assessment of open ocean ecosystems	6		Low confidence in epipelagic systems but would impact the deep pelagic	238
	SROCC	5.2.3.2.2	Magnitude, direction, and rate of change to the biological pump	2		Ocean Carbon Cycle	Future changes in the deep ocean	2		-	221
	SROCC	5.2.3.1.2	Biological contributions to carbon export projections	2		Ocean Carbon Cycle	Future changes in the epipelagic ocean	8		-	218
	1	5.2.1.3.1	model predicts the reemergence during the 21st century of previously stored anthropogenic CO2 in the mixed layer, which would change the seawater buffering capacity and reduce the ocean CO2 sink; trend not reflected in observation-based products, hence low confidence	2		Ocean Carbon Cycle	Historical Trends, Variability and Budgets of CO2, CH4 and N2O	5		stressors blank because the report makes the point that the causes/underlying processes for this hiatus at the global scale are unknown	25
	1	5.6.2.1.1	deliberate removal of atmospheric CO2 will partially be compensated by CO2 outgassing from the ocean as a response, but there is low confidence in the magnitude due to model disagreements	2	Ocean-Based Climate Interventions	Ocean Carbon Cycle	Carbon Cycle Response to Instantaneous CDR	2,3,4,5		-	40
	1	5.6.2.1.2	low agreement across models in representing ocean (and land) transition from sink to source of carbon in simulations with net negative emission	2		Ocean Carbon Cycle	Biogeochemical Implications of Carbon Dioxide Removal and Solar Radiation Modification	3		-	41
	1	5.6.2.2.3	ocean alkalinization contributes to climate change mitigation	2	Ocean-Based Climate Interventions	Ocean Carbon Cycle	Biogeochemical Implications of Carbon Dioxide Removal and Solar Radiation Modification	1		mentioned that there is no new evidence since SROCC, so reason of low confidence should be mentioned in SROCC	43
	2	13.4.1.2	Elevated CO2 levels predicted at 4°C GWL will affect the C/N ratio of organic-matter export and, efficiency of biological pump depending on the shifts in plankton composition and, hence, food-web structure	2		Ocean Carbon Cycle	Projected risks	8	Plankton composition	relevant to deep sea ecosystems since changes in biological pump efficiency and organic matter input will affect the deep sea	104
	SROCC	5.7	Oxygen and carbon measurements dense enough to measure deoxygenation and track mechanisms driving the carbon cycle.	2		Ocean Deoxygenation & Ocean Carbon Cycle	Key Uncertainties and Gaps	1		-	268
OTHER GREENHOUSE GAS CYCLES											518
	SROCC	5.7	Fate of methane in the deep ocean	1	Ocean Temperature/Heat Content	Other (Biogeochemical)	Key Uncertainties and Gaps	1		-	270
	SROCC	5.2.4.4	Dissociation of buried gas hydrates on margins	1	Ocean Temperature/Heat Content	Other (Biogeochemical)	Chemosynthetic Ecosystems	1		-	232
	1	5.3.3.2	"Projected oxygen loss in the ocean is thought to result in an ocean-climate feedback through changes in the natural emissions of GHG"	2	Ocean Deoxygenation	Other (Biogeochemical)	Ocean Acidification and Deoxygenation	1		-	29
	1	5.3.3.2	slower oceanic emissions of N2O are expected due to growing ocean deoxygenation and decreasing organic matter export	2	Ocean Deoxygenation	Other (Biogeochemical)	Ocean Acidification and Deoxygenation	2,3,5,6,8,9		-	30
FISHERIES + OTHER ECOSYSTEM SERVICES											519
	SROCC	5.4.1.1	Increased potential catches from deep sea fisheries/resources	1		Fisheries	Provisioning Services	1		-	243
	2	11.3.2.2	Low confidence of benefits to NZ fisheries by shifting subtropical/subpolar watermass boundaries in EEZ (nutrient regimes)	2	Nutrient Cycle	Fisheries	Coastal and Ocean Ecosystems	1		-	94
	2	12.3.7.3	Effects of changes in upwelling intensity on fisheries and aquaculture related livlihoods	2	Ocean Circulation	Fisheries	Southwestern South America Sub-Region Vulnerability	1		Upwelling intensity affects PP and food supply/particle flux to the deep sea	97
	2	13.4.1.1	Across all European seas there is low confidence of consistant change in provisioning ecosystem services (eg. fishing yields) because of interregional variability	2		Fisheries	Observed impacts	3,7		-	102
	2	Figure 16.6	Low confidence of evidence of transformational adaptation on ocean/coastal sector in multiple regions	2		Fisheries	Evidence of transformative adaptation by sector and region	7		Not deep sea specific, but generally focused on oceans/coastal sector (which contains deep sea regions)	117
	2	CCP4	uncertain consequences of ocean warming and acidification on fisheries	2	Ocean Acidification	Fisheries	Executive Summary	1		main text (p 2246) mentions 'warming and acidification may weaken mussel shells, negatively impacting shellfish aquaculture'	121
	SR 1.5C	3.4.4.12	ecosystem service impacts transition from low to high risk at warming of 1.5C and higher	2		Ecosystems	Key ecosystem services (e.g., carbon uptake, coastal protection and tropical coral reef recreation)	2		Low confidence in the rate of transition from moderate to high risks associated with 1.5C increase.	157
	SR 1.5C	3.4.6.3	Fisheries benefits and challenges of biogeographical shift of species towards higher latitudes in response to warming (e.g., increased production vs greater risk of disease and invasive species)	2	Ocean Temperature/Heat Content	Fisheries	Fisheries and aquaculture production	2		-	158
	SR 1.5C	3.7.2.4	Specific linkages between food security and changing coastal and ocean resources.	2		Fisheries	Ocean Systems (under Gaps in Understanding)	1		-	181
	SROCC	3.5.2.1	Need for fisheries management to respond to poleward shift in species distribution	2		Fisheries	Commercial Fisheries	1		-	205
	SROCC	3.7	Future fisheries response (target level adjustment) to environmental change	2		Fisheries	Key Knowledge Gaps and Uncertainties	8	unknown management strategy	-	209
	SROCC	5.4.1.1	Climate impacts on specific fish stocks	2		Fisheries	Provisioning Services	3,7,8		deep ocean is not specifically mentioned but one reason for low confidence is because available datasets are biased towards epipelagic and coastal areas	241
	SR 1.5C	3.4.4.2	Decreased productivity of low and mid-latitude fisheries where warming and/or reduced mixing from reduced upwelling (increased stratification) is decreasing NPP	2	Ocean Temperature/Heat Content & Meso/Submeso-scale processes inc. mixing & Ocean Circulation	Fisheries	Warming and stratification of the surface ocean	1		cited with "low-medium confidence"	150
	2	5.8.3	Climate-change-induced proliferation of invasive species and their impact on fisheries productivity	2	Ocean Temperature/Heat Content	Fisheries	Projected Impacts (within "5.8. Ocean-Based and Inland Fisheries Systems section")	1		two cited papers cited: Goldsmith et al. 2019 does not mention invasive species at all (why is it cited?); Mellin et al. 2016 talks about the crown-of-thorns seastar which is shallow, but the same sort of issues can affect the deep ocean. For example, lionfish are known to invade the bathyal zone in Bermuda. In terms of explabation for the low confidence, it must be data limitation, based on that…	88
	SROCC	5.4.1.1	Projected increase in fish catch potential in the Arctic	2		Fisheries	Provisioning Services	3		-	242
	SROCC	3.2.3.1.3	Barent Sea cod response under RCP8.5	2	Ocean Acidification & Ocean Temperature/Heat Content	Fisheries	Fish (within Arctic section)	1		high ocean T is also reported as a stressor	195
	SROCC	Fig. SPM.3	Arctic and Antarctic biomass changes and fisheries catch	2	Macro-nutrients cycle	Biomass & Fisheries	Projected Changes and Risks	1		Projected changes in the Arctic regions have low confidence due to uncertainties associated with modelling multiple interacting drivers and ecosystem responses	279
	SROCC	3.2.4.1.2	climate impacts on Southern ocean krill fisheries	2	Ocean Temperature/Heat Content	Fisheries	Southern Ocean	1		-	201
	SROCC	3.2.4.1.2	climate impacts on Southern ocean finfish fisheries	2	Ocean Temperature/Heat Content	Fisheries	Southern Ocean (within Fisheries section)	1		another sressor is cited as "availability of krill prey"	202
CLIMATE INTERVENTION IMPACTS											520
	2	16.Executive summary	Low confidence in projected benefits or risks of solar radiation modification (SRM) on ecosystems	2	Geoengineering (exl. OBCI)	Ecosystems	Key risks across climate and development pathways	2		generally references risks to ecosystems; ocean relevamt since next sentence states that "SRM would not stop CO2 from increasing in the atmosphere or reduce resulting ocean acidification under continued anthropogenic emissions (high confidence)"	128
	3	14 Cross working group Box 4 - Solar Radiation Modification	Low confidence in understanding the climate response to solar radiation modification (SRM) at the regional scale	2	Geoengineering (exl. OBCI)	Ocean Circulation	SRM risks to human and natural systems and potential for risk reduction	7		Not deep sea specific, but one of the climate respones discusses was weakening of the Atlantic meridional overturning circulation, and some of the proposed solar radiation modification techniques propsed at ocean-specific (marine cloud brightening, ocean albedo change) and could include effects on the deep sea	132
	3	14 Cross working group Box 4 - Solar Radiation Modification	Few studies have assessed the potential solar radiation modification (SRM) impacts on ecosystems including marine ecosystems	2	Geoengineering (exl. OBCI)	Fisheries	SRM risks to human and natural systems and potential for risk reduction	2		Not deep sea specific (generally references impacts on ecosystems), but marine ecosystems are then discussed. marine cloud brightening (MCB) could can changes in marine net primary productivity by reducing light availability in deployment regions, with important fishing regions off the west coast of S. America showing both large increases and decreases in productivity	133
	3	12.7	Interactions (synergies and trade-offs) between different CDR methods when deployed together, including for biodiversity and ecosystem services.	2	Ocean-Based Climate Interventions	Biodiversity	Knowledge Gaps	1		There is acknowledgement of tradeoffs but no discussion of these. There is also no discussion of governance limitations in the deep ocean.	131
	SR 1.5C	2.6.3	CDR technologies other than BECCS and afforestation (i.e., including mCDR implicitly) has not been comprehensively assessed in integrated assessment approaches, no technology is close to deployment at scale, and rugulatory frameworks are not established	2		Ocean-Based Climate Interventions	Carbon Dioxide Removal (CDR) (under Knowledge Gaps)	2		-	142
	SR 1.5C	2.6.3	Substantial uncertainty about adverse effects of large-scale CDR (mCDR implicit) on environment and sustainable development goals	2	Ocean-Based Climate Interventions	Ecosystems	Carbon Dioxide Removal (CDR) (under Knowledge Gaps)	1		-	143
GENERIC IMPACTS (INC FOR DIFFERENT EMISSIONS SCENARIOS)											521
	1	12.4.8 Table 12.10	Summary of confidence in direction of projected change in climatic impact-drivers in open and deep ocean regions in the Equatorial Pacific, Equatorial Atlantic Oceans, and Arabian Sea	1			Open and Deep Ocean	1		-	66
	1	12 Table 12.2	Low confidence in the relevance of key climatic impact-drivers for the open ocean and deep sea	1			Climatic Impact-drivers for Sectors	2		-	67
	SR 1.5C	3.7.1	Regional and global climate model simulations for low-emissions scenarios such as a 1.5°C warmer world.	2			Gaps in Methods and Tools	2,9		-	162
	SR 1.5C	3.7.1	Robust probabilistic models which separate the relatively small signal between 1.5°C versus 2°C from background noise, and which handle the many uncertainties associated with non- linearities, innovations, overshoot, local scales, and latent or lagging responses in climate.	2			Gaps in Methods and Tools	2,9		-	163
	SR 1.5C	3.7.1	Projections of risks under a range of climate and development pathways required to understand how development choices affect the magnitude and pattern of risks, and to provide better estimates of the range of uncertainties.	2			Gaps in Methods and Tools	2,9		-	164
	SR 1.5C	3.7.1	More complex and integrated socio-ecological models for predicting the response of terrestrial as well as coastal and oceanic ecosystems to climate and models which are more capable of separating climate effects from those associated with human activities.	2		Ecosystems	Gaps in Methods and Tools	2,9		-	165
	SR 1.5C	3.7.1	Tools for informing local and regional decision-making, especially when the signal is ambiguous at 1.5°C and/or reverses sign at higher levels of global warming.	2			Gaps in Methods and Tools	9		-	166
	SR 1.5C	3.7.2.1	The cumulative effects of multiple stresses and risks at 1.5C warming (deep ocean implicit here).	2			Earth systems and 1.5°C of global warming (under Gaps in Understanding)	1		-	167
	SR 1.5C	3.7.2.1	The distinct impacts of different overshoot scenarios, depending on (i) the peak temperature of the overshoot, (ii) the length of the overshoot period, and (iii) the associated rate of change in global temperature over the time period of the overshoot (deep ocean implicit here)	2			Earth systems and 1.5°C of global warming (under Gaps in Understanding)	1		-	169
	AR6 Synthesis	3.1.3	Abrupt and irreversible change and tipping points (general) (e.g.,ice sheet instability or ecosystem Loss) at warming of 2.5-4C	2		Sea Ice/Ice Shelves/Ice Sheets & Ecosystems	The Likelihood and Risks of Abrupt and Irreversible Change	1		-	137
	SROCC	3.7	Polar ocean response to low. vs very low emissions	2			Key Knowledge Gaps and Uncertainties	1		-	210
	SROCC	3.7	precursors/indicators of polar system regime shifts (no specific parts of system mentioned)	2			Key Knowledge Gaps and Uncertainties	1		-	211
	SROCC	1.8.1.1	Limitations in knowledge of ocean and cryosphere change remain, creating knowledge gaps for the SROCC assessment	2			Ocean and Cryosphere Observations	1		-	275
	SROCC	6.1	impacts of rare events or irreversible phenomena on natural or human systems	2		Ecosystems	Knowledge Gaps (Extreme Events)	2		-	248
	SROCC	6.1	economic impacts of extreme and abrupt/irreversible events	2			Knowledge Gaps (Extreme Events)	2		-	249
	SROCC	6.1	managing risks and adaptation strategies for abrupt and irreversible events	2			Knowledge Gaps (Extreme Events)	2		-	250
	SROCC	6.1	combined impacts of climate-driven events and societal development or maladaptation	2			Knowledge Gaps (Extreme Events)	2		-	251
	SROCC	6.1	compound risks and cascading impacts	2			Knowledge Gaps (Extreme Events)	2		-	252
	SROCC	6.1	application of transformative governance	2	management/policy		Knowledge Gaps (Extreme Events)	2	few practical demonstrations	-	253
OMITTED:
LAND											500
	SR 1.5C	3.7.2.1	Feedbacks associated with changes in land use/cover for low- emissions scenarios, for example feedback from changes in forest cover, food production, biofuel production, bio-energy with carbon capture and storage (BECCS), and associated unquantified biophysical impacts.	3			Earth systems and 1.5°C of global warming (under Gaps in Understanding)	1		-	168
	SR 1.5C	3.7.2.2	Critical thresholds for extreme events (e.g., drought and inundation) between 1.5°C and 2°C of warming for different climate models and projections. All aspects of storm intensity and frequency as a function of climate change, especially for 1.5°C and 2°C warmer worlds, and the impact of changing storminess on storm surges, damage, and coastal flooding at regional and local scales.	3			Physical and chemical characteristics of a 1.5°C warmer world (under Gaps in Understanding)	1		-	170
	SR 1.5C	3.7.2.2	The timing and implications of the release of stored carbon in Arctic permafrost in a 1.5°C warmer world and for climate stabilization by the end of the century.	3			Physical and chemical characteristics of a 1.5°C warmer world (under Gaps in Understanding)	1		-	171
	SR 1.5C	3.7.2.3	The dynamics between climate change, freshwater resources and socio-economic impacts for lower levels of warming.	3			Terrestrial and freshwater systems (under Gaps in Understanding)	1		-	173
	SR 1.5C	3.7.2.3	How the health of vegetation is likely to change, carbon storage in plant communities and landscapes, and phenomena such as the fertilization effect.	3			Terrestrial and freshwater systems (under Gaps in Understanding)	1		-	174
	SR 1.5C	3.7.2.3	The risks associated with species’ maladaptation in response to climatic changes (e.g., effects of late frosts). Questions associated with issues such as the consequences of species advancing their spring phenology in response to warming, as well as the interaction between climate change, range shifts and local adaptation in a 1.5°C warmer world.	3			Terrestrial and freshwater systems (under Gaps in Understanding)	1		-	175
	SR 1.5C	3.7.2.3	The biophysical impacts of land use in the context of mitigation pathways.	3			Terrestrial and freshwater systems (under Gaps in Understanding)	1		-	176
	SR 1.5C	3.7.2.5	The impacts of global and regional climate change at 1.5°C on food distribution, nutrition, poverty, tourism, coastal infrastructure and public health, particularly for developing nations.	3			Human systems (under Gaps in Understanding)	1		-	182
	SR 1.5C	3.7.2.5	Health and well-being risks in the context of socio-economic and climate change at 1.5°C, especially in key areas such as occupational health, air quality and infectious disease.	3			Human systems (under Gaps in Understanding)	1		-	183
	SR 1.5C	3.7.2.5	Micro-climates at urban/city scales and their associated risks for natural and human systems, within cities and in interaction with surrounding areas. For example, current projections do not integrate adaptation to projected warming by considering cooling that could be achieved through a combination of revised building codes, zoning and land use to build more reflective roofs and urban surfaces t…	3			Human systems (under Gaps in Understanding)	1		-	184
	SR 1.5C	3.7.2.5	Implications of climate change at 1.5°C on livelihoods and poverty, as well as on rural communities, indigenous groups and marginalized people.	3			Human systems (under Gaps in Understanding)	1		-	185
	SR 1.5C	3.7.2.5	The changing levels of risk in terms of extreme events, including storms and heatwaves, especially with respect to people being displaced or having to migrate away from sensitive and exposed systems such as small islands, low-lying coasts and deltas.	3			Human systems (under Gaps in Understanding)	1		-	186
	SR 1.5C	Table 3.6	A permafrost collapse may occur with warming of 2-3C resulting in runoff and sealevel rise?	3			Emergence and intensity of climate change hotspots under different degrees of global warming.	2		-	189
	2	15.1.1	Climate change consequences on small islands, including SDG implications and the need for climate resilient development paths	3			Introduction	1		Tropical focus	108
	2	15.2.1	Increased vulnerability, impacts, and risks for small islands. Scientific research since AR5 on temperature rise, increasing tropical cyclones, coral reef degradation, sea level rise and severe sea level occurrences, biodiversity loss, habitability	3			Points of Departure from AR5	1		Similar to the hazards encountered by insular biodiversity hotspots, isolated deep-sea species may experience heightened risk. While the focus is on small islands, the principles of increased susceptibility and danger as global temperatures rise may be applied to deep-sea ecosystems as well.	109
	2	15.2.2	Evidence of migration as an adaptation response, the function of ecosystem-based adaptation (EbA), and the involvement of social capital, health-related adaptation methods, and livelihood responses. Impacts on marine and coastal systems, freshwater systems, terrestrial biodiversity systems, settlements, infrastructure, human health, well-being, water security, fisheries, agriculture, economics, a…	3			Points of Departure on Adaptation	1		The chapter gives an in-depth look at the present state of knowledge about the effects of climate change on small islands and their adaptation strategies. However, certain areas, such as ecosystem-based adaptation efficacy, monitoring and evaluating adaptation responses, and assessing climate-induced losses, require further research and data collecting. The material in question has little to do w…	110
	2	15.3.1	Climate change-related consequences and dangers are amplified on islands due to their boundedness, small land area, and remoteness. Increased evidence of warming, especially in the second half of the twentieth century; regional differences in sea level rise; and repercussions such as coastal erosion and marine flooding, as well as their effects on ecosystems, ecosystem services, and human activit…	3			Observed Impacts and Projected Risks of Climate Change	1		The material presented in this section mostly focuses on surface level consequences and does not specifically address the impacts of climate change on the deep sea. Understanding how changes such as warming, sea-level rise, and other climate-related stresses influence deep-sea habitats near small islands is clearly lacking. For example, the consequences of global warming and changes in ocean chem…	111
	2	15.3.3.1.1	Flooding, coastal erosion, and reef island destabilisation	3			Observed Impacts and Projected Risks on Natural Systems	1		Changes in coastal erosion, sea level, and storm activity may all have an impact on sediment transport into the deep sea. This might have an effect on deep-sea habitats by altering the quantity of organic matter that sinks from surface waters, which is a primary source of food for many deep-sea species. Likewise, human disruptions and shifting weather patterns may result in additional pollutants …	113
	2	15.3.3.1.2	Erosion on high islands, stability on reef islands	3			Reef island destabilisation and coastal erosion	1		-	114
	3	3.6.2	However, there are estimates that are higher than AR5, indicating that global aggregate economic impacts could be higher than previously estimated (low confidence due to the lack of comparability across methodologies and lack of robustness of estimates) (AR6 WGII Cross-Working Box ECONOMIC).	3			Economic Benefits of Avoiding Climate Change Impacts	11	different approaches to quantification of aggregated economic impacts of climate change	-	130
PRECIPITATION											501
	2	13.1.4	Precipitation extremes have not changed in MED	3			European Climate: Main Conclusions of WGI AR6	1		MED includes Southern Europe and Northern Africa. Low confidence statement not specifically related to the deep sea or the Mediterranean Sea.	98
	2	CCP4.1.3	low conficence in no projected changes in precipitation extremes in south Med	3			Observed and Projected Climate Change	1		No deep-sea related but could cause changes in air-sea fluxes that can affect deep waters formation and properties	122
	2	14.2.1	Increased intensity of atmospheric rivers	3			Observed changes in North America climate	11	Trend detection	-	106
	SR 1.5C	3.3.3.1	Positive or negative trends asscoiated with mean precipitation over all latitidues except for the mid-latitiude land areas of the Northern Hemisphere	3			Observed and attributed changes in regional precipitation	11	Poor data quality, incomplete data or disagreement amongst avaiable estimates	Relevant to the deep-sea in that all precipitation rates will be impacted by the larger global circumation system (including bottom-water circulation)	144
	SR 1.5C	3.3.3.2	Changes in monsoon precipitation at 1.5C versus 2C	3			Projected changes in regional precipitation at 1.5C versus 2C of global warming	11	No specific assessments of changes in monsoon precipitation at 1.5C versus 2C. Overall, regions that display statistically significant changes in heavy precipitation between 1.5°C and 2°C of global warming are located in high latitudes (Alaska/western Canada, eastern Canada/Greenland/Iceland, northern Europe, northern Asia) and high elevation (e.g., Tibetan Plateau), as well as in eastern Asia (i…	Relevant on a global circulation scale.	145
	SR 1.5C	3.5.2.2	Regarding extreme weather events, this report overall lacks confidence in projecting levels as which global warming could lead to very high risks assoiciated with extreme weather events.	3			RFC 2 - Extreme weather events	2,3,4		-	159
	SR 1.5C	Table 3.2	Drought and dryness	3			Summary of assessments of global and regional climate changes and associated hazards	1		Low confidence regarding drought and dryness trends across the globe.	187
CYCLONES											502
	2	9.6.1.4	Limited confidence in attributing cyclone-induced impacts to climate change	3			Marine Ecosystems	2,5,7,9,11		Due to the lack of reliable long-term data sets, there is currently limited confidence in attributing cyclone-induced impacts to climate change.	91
	SR 1.5C	2.5.3	None specific to the deep-sea, but very early in the report (not Chapter 2) it mentions low confidence in tropical cyclones being projected to decrease in frequency but increase in very intense frequency, which could be related to the deep-sea if ocean heat content below 200 meters depth is relevant to fueling tropical cyclones (not well-known)	3			Sustainable Development Features of 1.5oC Pathways	5		-	141
	SR 1.5C	3.3.6	Four decades is too short of a timespan to detect anthropogenically induced trends from decadal and multi-decadal variability, with regard to cyclone numbers under global warming projections. Also conclusions based around the number of intense cyclones globally is not detectable. Finally, the global number of tropical cyclones will be lower under 2C compared to 1.5C of global warming, but with an…	3			Tropical Cyclones and Extratropical Storms	2,4,5,7,9		May miss some important trends as remote sensing cabailities have only recently advanced to make long term projections based on historical data. May be relevant to the deep-sea in that ocean circulation patterns and termpatures can result in cyclones or extratropical storms.	146
	SR 1.5C	Table 3.2	Tropical and extra-tropical cyclones	3			Summary of assessments of global and regional climate changes and associated hazards	1		Low confidence regarding robustness of all reports.	188
	SROCC	CCB9, Table CB9.1	Changes in global tropical cyclone frequncy	3			Drivers of Impacts and Risks	2,4,5		Low confidence in the observed intensity changes associated with the "likely" poleward movement of circulation features in relation to storms. Also, low confidence in how global tropical cyclone frequency will change. Both could be realted to the deep-sea if the water temperature below 200 meters is relevant to fuelling tropical cycles/extratropical cyclones (unknown).	265
	SROCC	6.3.1.1	Region-specific projections of tropical cyclone frequency and intensity	3			Tropical Cyclones	2,10		note that the "impacts" section of the text about storms focuses on impacts for coastal cities, not deep sea impacts	254
	SROCC	6.3.1.1	observed poleward migration of the latitude of maximum TC intensity in the western North Pacific	3			Tropical Cyclones	2,10		-	255
	SROCC	6.3.1.1	global projections of TC frequency	3			Tropical Cyclones	3		-	256
OTHER WIND											502
	1	10.1.CC Box 10.1	Contribution of Arctic warming to mid-latitude atmospheric changes compared to other drivers.	3			Influence of the Arctic on Mid-latitude Climate	1		Largely pertains to terrestrial content however speaks of sea ice which certinaly correlates to the deep-sea.	64
	2	CCP4.3.2	small projected changes in wind, storms and waves (in Med)	3			Coastal Systems	9		(1) Does not mention 'low confidence' but mentions that 'confidence is limited'; (2) Not deep-sea related, but air-sea changes discussed could affect formation rates and properties of deep waters	124
	SROCC	6.3.1.2	Future changes in blocking and storm tracks in the northern hemisphere.	3			Extratropical Cyclones and Blocking	3,5,10		see above	257
	SROCC	6.3.1.3	Global wave power has increased over the last six decades, correlation to SST	3			Waves and extreme sea level	2,5,9		see above	258
	SROCC	6.3.1.3	GCM ability to represent small-scale weather systems	3			Waves and extreme sea level	9		see above	259
	SROCC	6.5.1.2	Frequency of extreme IOD events	3			Indian Ocean Basin-wide Warming and Changes in Indian Ocean Dipole (IOD) Events	10	model bias	-	260
ICE SHEET/SEA LEVEL											502
	2	CCP4.4.5	impact of ice sheet collapse on sea level rise adaptation (in Med)	3			Limits to Adaptation, Equity and Climate Justice	2		The statement is about adaptation of societies to sea level rise, that could affect in turn the deep ocean but the link is very indirect	125
	2	13.2	Venice lagoon SLR due to ice sheet instability	3			Box 13.1.1	1		Not deep-sea related; the maximum depth of the Venice lagoon is 50 m.	100
	2	13.2.1.1	SLR will increase erosion of sandy shorelines (low confidence in quantitative assessment of erosion rates and amounts)	3			Risk of coastal flooding and erosion	2		Not explicitly deep sea focused	101
OCEAN SHELVES (<200m?) & SHALLOWS											510
	1	9.2.3.2	ocean temperature change on the Antarctic continental shelf	3			Southern Ocean	5,9,11	southern ocean SST biases in CMIP6	processes controlling shelf waters (~0-500m?), including atm-oce-ice feedbacks, are too small and transient to observe and resolve in CMIP models. NB "low confidence" changes reported in SO overturning in this section are not included here, as these are made with reference to the SROCC	52
	1	9.2.3.6	Future projections of centennial coastal climate change	3			Coastal Systems and Marginal Seas	9		low confidence if regional downscaling or refinement is lacking.	58
	2	CCP6.2.1.1	Impacts of warming on phytoplankton and fish in shelf areas including sub-Antarctic islands	3			Warming and sea ice retreat cause shifts in distribution ranges of species	1		This result directly refers to all "low confidence" points outlined in Tables CCP6.1 and CCP6.2.	126
	SROCC	3.2.3.1	impacts of climate-driven ocean change on the benthos in Arctic shelf ecosystems	3			Arctic	1		-	192
	1	9.2.2.3	ability of models to simulate CDW access to ice-shelf cavities and underlying processes	3			Water Masses	9		many other mentions of "low confidence" in this section that were referencing assessments made in the SROCC have been omitted	49
	1	3.5.1.1	the CMIP6 models show a somewhat more realistic pattern of SST trends (low confidence)	3			Sea surface and Zonal Mean Ocean Temperature Evaluation	1		Point is about low confidence in SST, but question is how much this affects the model warm bias in the deep ocean interior.	10
	2	13.4.1.2	Losses are projected for Posidonia oceanica seagrass habitats in the Mediterranean by up to 75% at 2.5°C GWL	3			Projected risks	1		Low confidence statement focused on shallow water marine habitat (seagrass beds); not explicitly deep sea focused	105
	2	14.5.2.1	Beaching of Sargassum/Sargassum blooms	3			Observed impacts and projected risks of climate change	5,10		Potential organic input to deep sea if sinks	107
GENERIC IMPACTS											510
	2	5.14.1.2	Low confidence that climate services are contributing to food security and nutrition, and are accessed by the vulnerable	3			Climate services (within "5.14 Implementation Pathways to Adaptation and Co-benefits" section)	1		paper cited (Ouedraogo et al. 2018) also focuses on fisheries that could be deep-water (does not say). Since this is a broader issue that affects all environments that provide food, can be linked to the deep-ocean	89
	2	5.14.1.2	Ways to address the above	3			Climate services (within "5.14 Implementation Pathways to Adaptation and Co-benefits" section)	1		Similar to the above. All the cited papers refer to agriculture, but the lessons learned can be applied to any ecosystem providing food, including the deep-sea	90
	2	5.8.1 (paragraph 3)	Climate change affecting the nutritious value of seafood.	3			Observed Impacts (within "5.8. Ocean-Based and Inland Fisheries Systems section")	3		in all papers cited none of the species are known to occur below 200m. However, this an issue that concerns deep-water commercially important species (e.g. alfonsinos)	87
	3	Box 3.4	Few cumulative CO2 emissions from AR6 scenarios limit warming to below 1.5°C with a 50% chance, thus statistics for that specific threshold have low confidence	3			Consistency of Remaining Carbon Budgets in the WGI Assessment and Cumulative CO2 Emissions in WGIII Mitigation Pathways	1		-	129
